# Supplementary material for: Modulating fluorescence sensing properties of excited-state intramolecular proton transfer (ESIPT)-based metal organic frameworks (MOFs) by metal polarization
Source: Royal Society of Chemistry journal article supplement (doi:10.1039/d2ce00047d), 2022-01-01
Supplement: d2ce00047d1.pdf [file d2ce00047d1.pdf]

## Electronic Supplementary Information

### **Modulating fluorescence properties of excited-state intramolecular proton transfer (ESIPT) based metal organic frameworks by metal polarization**

Xin Yan,<sup>a</sup> Jiao Lei,<sup>a</sup> Yong-Peng Li,<sup>b</sup> Peng Zhang<sup>\*a</sup>, Ying Wang,<sup>a</sup> Shu-Ni Li,<sup>a</sup> Quan-Guo Zhai<sup>\*a</sup>

<sup>a</sup> *Key Laboratory of Macromolecular Science of Shaanxi Province, Key Laboratory of Applied Surface and Colloid Chemistry, Ministry of Education School of Chemistry & Chemical Engineering, Shaanxi Normal University, Xi'an, Shaanxi, 710062, China*

<sup>b</sup> *School of Chemistry and Chemical Engineering, Institute of Applied Catalysis, Yantai University, Yantai, 264005, China*

*\*Corresponding authors*

*E-mail: peng.zhang@snnu.edu.cn (P. Zhang);*

*zhaiqg@snnu.edu.cn (Q.-G. Zhai)*

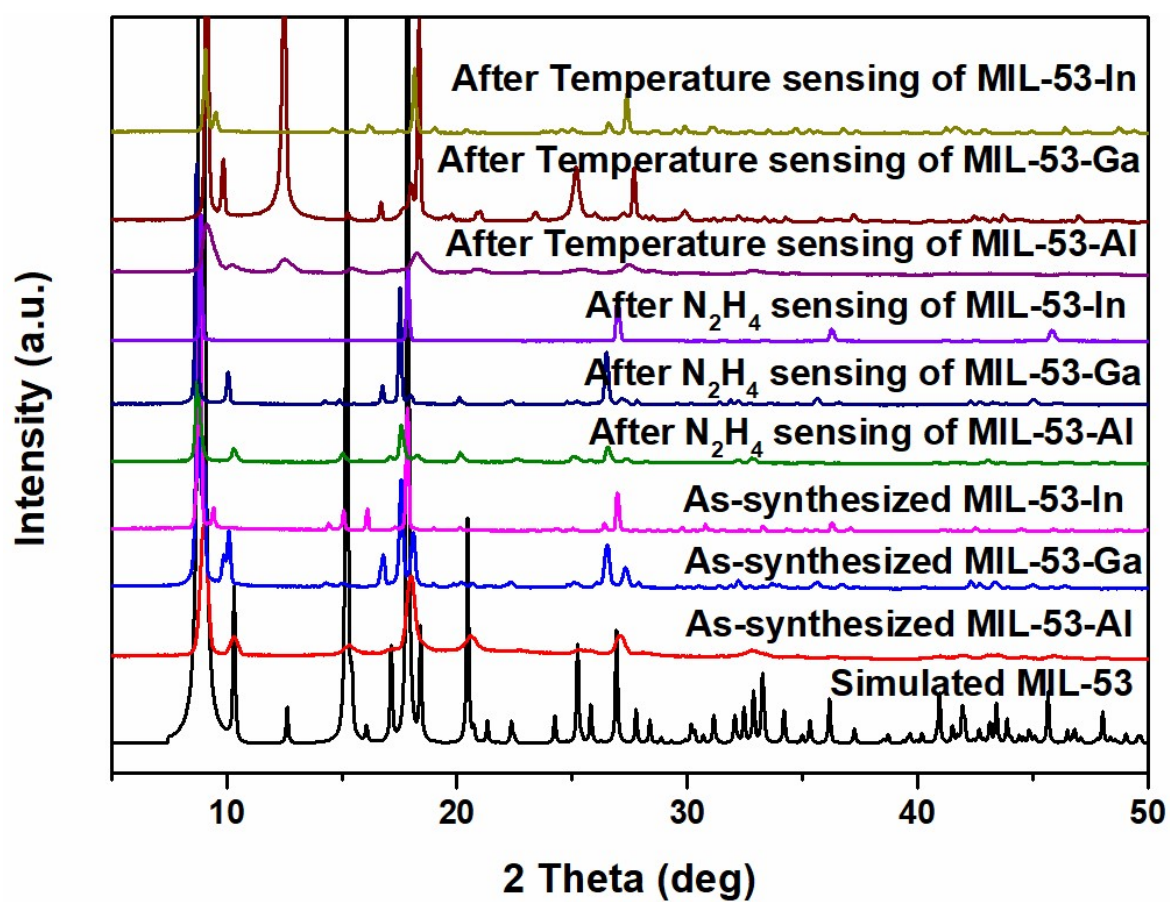

**Fig. S1.** PXRD patterns of MIL-53-Al/Ga/In as-prepared, after  $N_2H_4$  sensing and temperature sensing.

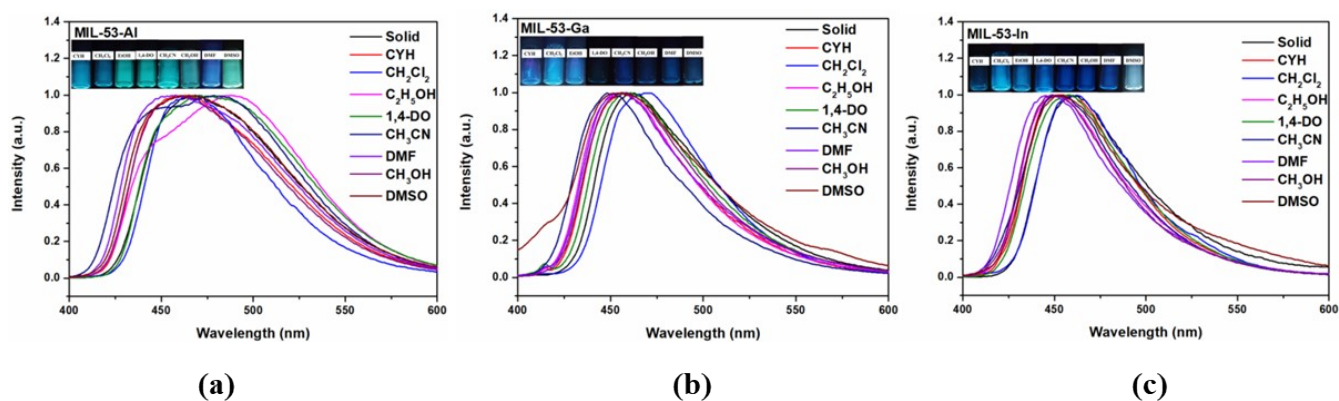

**Fig. S2.** Fluorescence emission spectra of MIL-53-Al/Ga/In in different solvents.

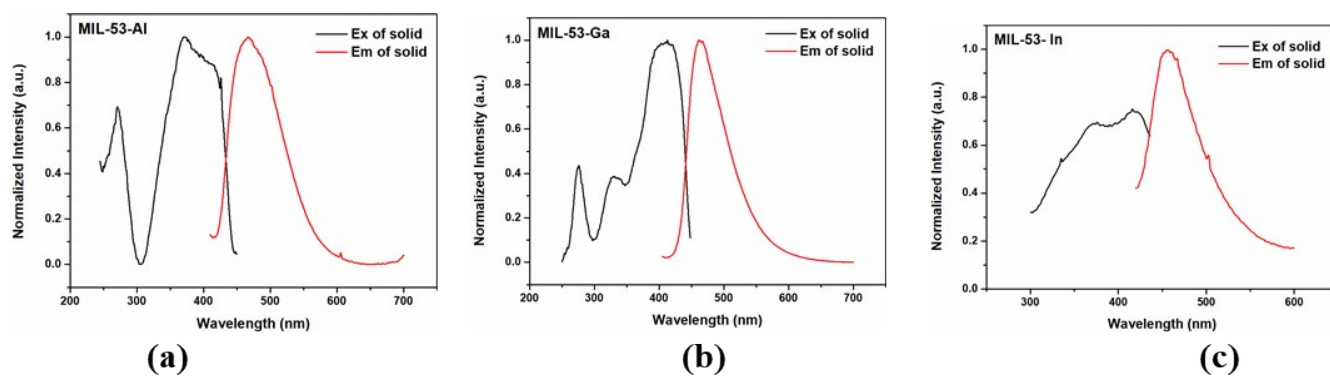

**Fig. S3.** Solid-state fluorescence emission spectra of MIL-53-Al/Ga/In.

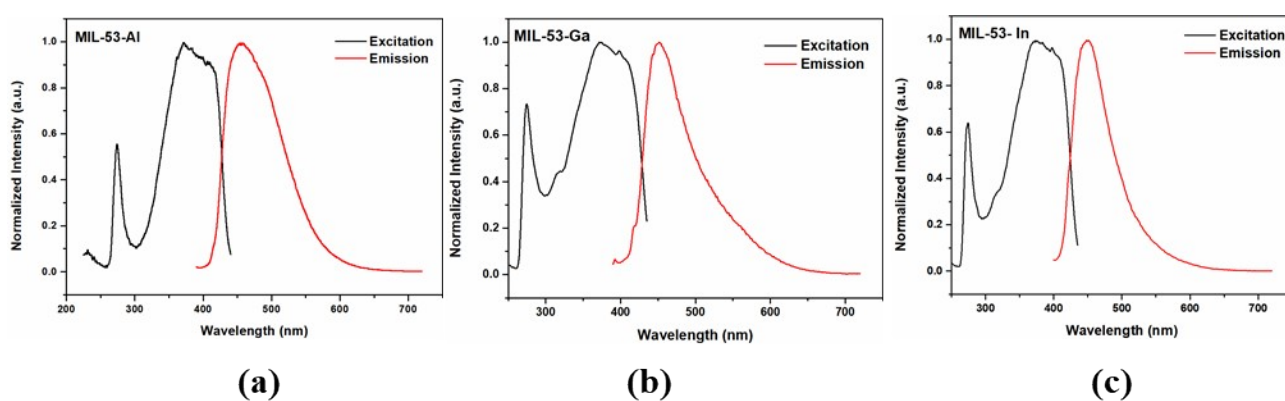

**Fig. S4.** Fluorescence emission spectra of MIL-53-Al/Ga/In suspension in DMF.

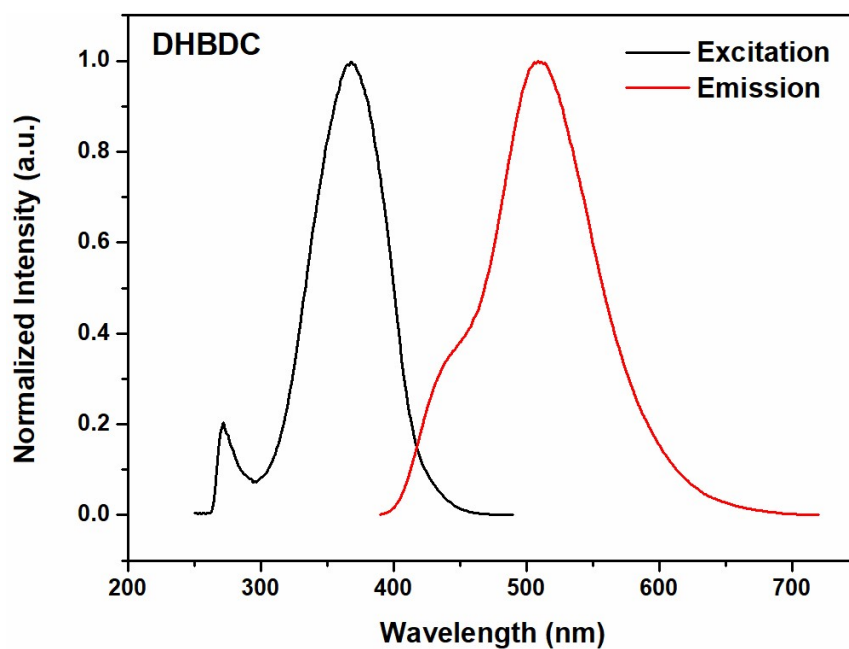

**Fig. S5.** Fluorescence emission spectra of DHBDC in DMF.

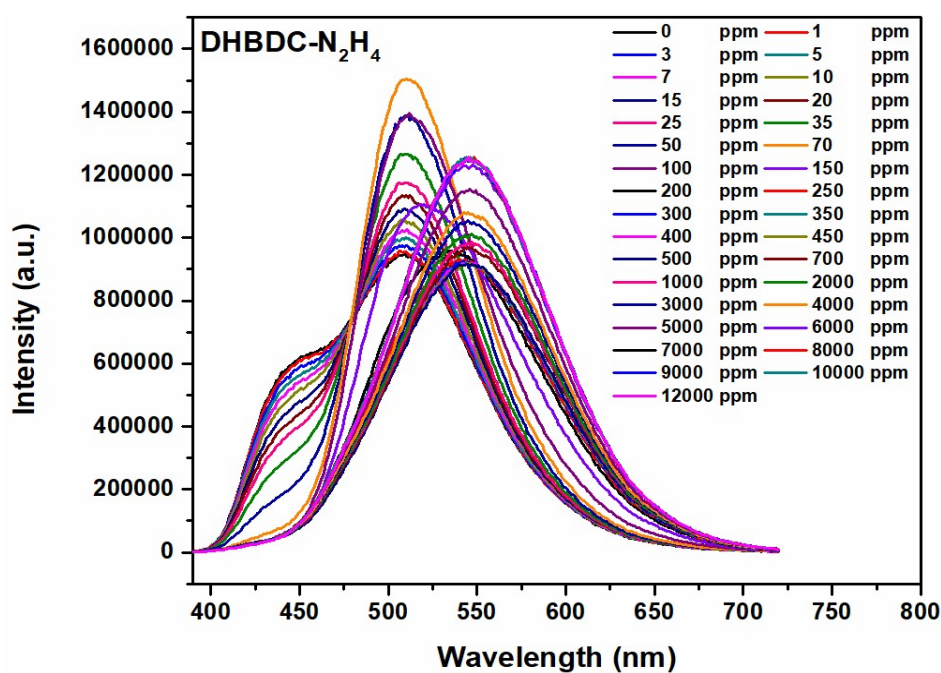

**Fig. S6.** Fluorescence spectra of  $\text{N}_2\text{H}_4$  detected by DHBDC.

\* In order to minimize the volatilization of  $\text{N}_2\text{H}_4$ , a freshly prepared  $\text{N}_2\text{H}_4$  solution in DMF was used, quickly added to the probe suspension and covered with a colorimetric cap. Due to the low concentration of  $\text{N}_2\text{H}_4$  (ppm level) added in the detection, and the continuous increase of  $\text{N}_2\text{H}_4$  concentration in the same MOF suspension for spectra measurement, it has little impact on the accuracy of the detection.

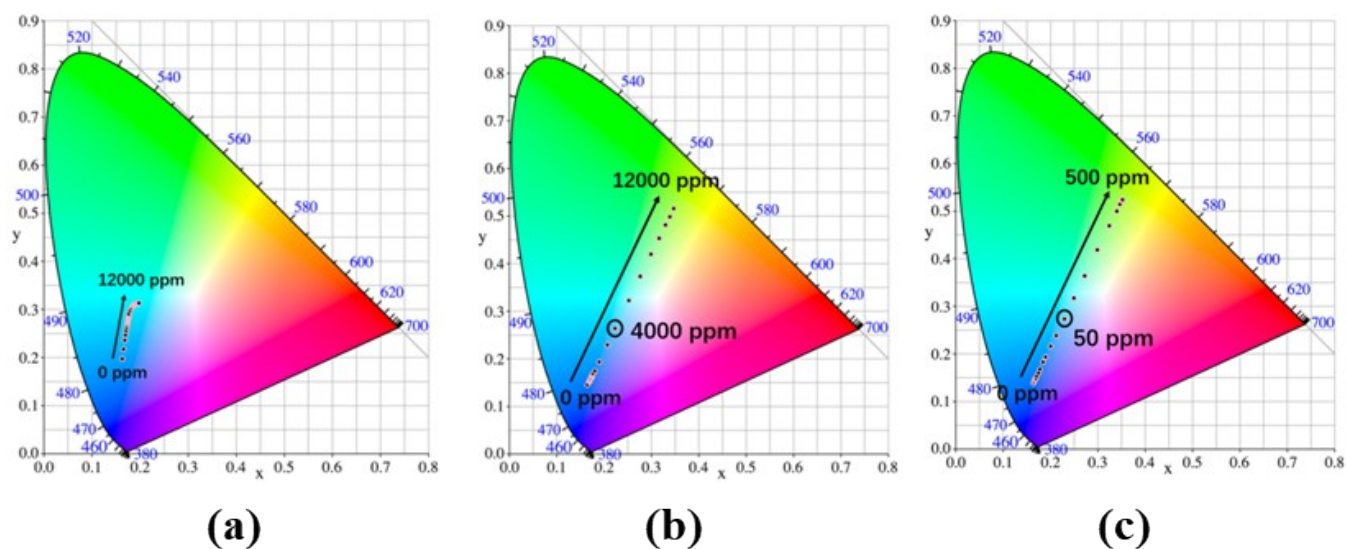

**Fig. S7.** The CIE chromaticity diagram of MIL-53 sensing process for  $N_2H_4$ : (a) MIL-53-Al; (b) MIL-53-Ga; (c) MIL-53-In.

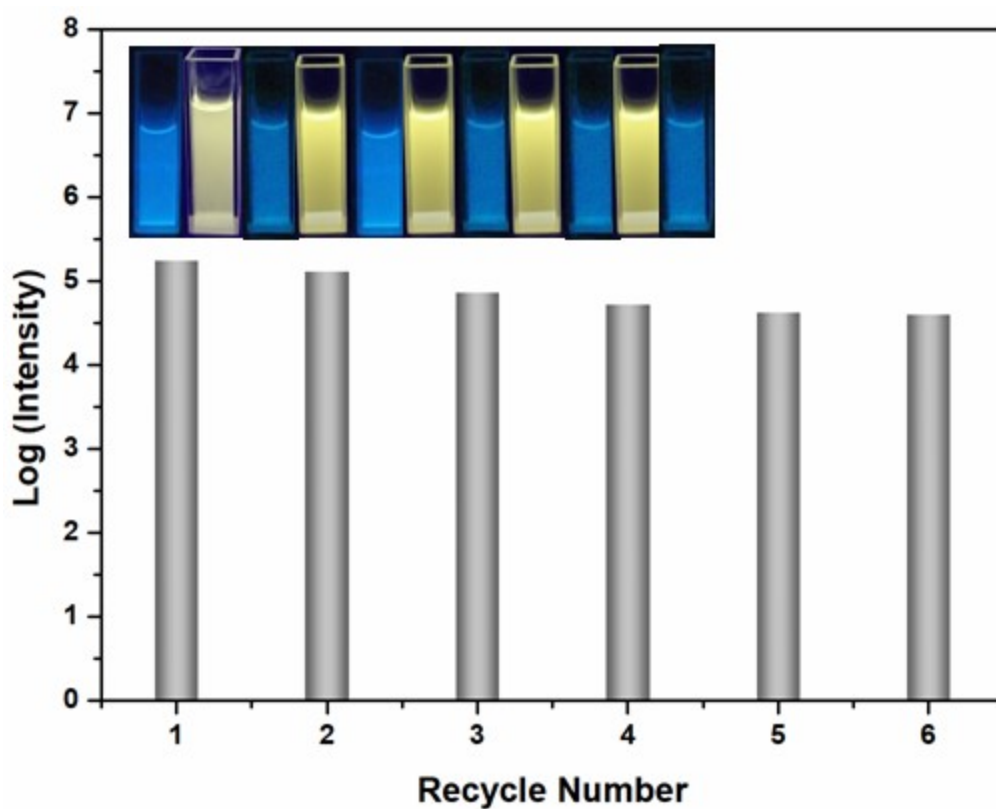

**Fig. S8.** The cyclic detection process of MIL-53-Ga for  $N_2H_4$  (12000 ppm) sensing.

\* The MOF suspension after hydrazine detection was centrifuged, washed and centrifuged 5 times by DMF, and dried by  $N_2$  with suitable flow rate, which can be well regenerated as detailed in Fig. 4(a) and Fig. S8.

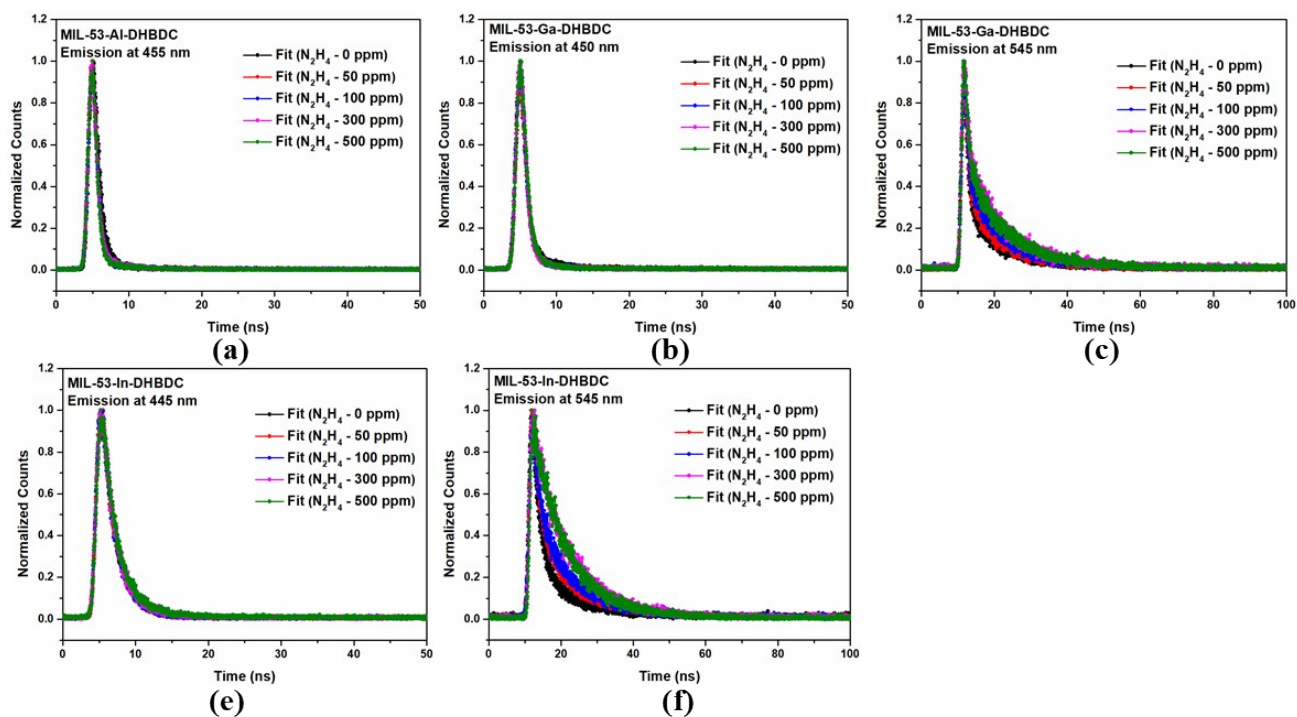

**Fig. S9.** Normalized fluorescent time-correlated decay curves of MIL-53: (a) MIL-53-Al at 455 nm; (b) MIL-53-Ga at 450 nm (c) MIL-53-Ga at 545 nm (d) MIL-53-In at 445 nm (e) MIL-53-In at 445 nm (f) MIL-53-In at 545 nm.

**Table S1.** Average fluorescence lifetime and quantum yield of MIL-53-Al/Ga/In with different concentrations of N<sub>2</sub>H<sub>4</sub>

| [N <sub>2</sub> H <sub>4</sub> ]<br>(ppm) | Average lifetime |                | Quantum<br>yield<br>(%) | Average lifetime |                | Quantum<br>yield<br>(%) | Average<br>lifetime | Quantum<br>yield<br>(%) |
|-------------------------------------------|------------------|----------------|-------------------------|------------------|----------------|-------------------------|---------------------|-------------------------|
|                                           | 445 nm<br>(ns)   | 545 nm<br>(ns) |                         | 450 nm<br>(ns)   | 545 nm<br>(ns) |                         | 445 nm<br>(ns)      |                         |
|                                           | In               |                |                         | Ga               |                |                         | Al                  |                         |
| 0                                         | 2.17             | 7.41           | 11.3                    | 1.94             | 7.99           | 6.1                     | 1.26                | 25.1                    |
| 50                                        | 2.22             | 8.77           | 11.8                    | 1.58             | 8.40           | 5.5                     | 1.25                | 25.4                    |
| 100                                       | 2.23             | 9.62           | 19.1                    | 1.59             | 9.12           | 5.7                     | 1.22                | 25.7                    |
| 300                                       | 2.69             | 10.06          | 35.6                    | 1.49             | 9.89           | 6.1                     | 1.27                | 25.6                    |
| 500                                       | 3.03             | 10.01          | 45.1                    | 1.38             | 9.89           | 6.2                     | 1.31                | 25.9                    |

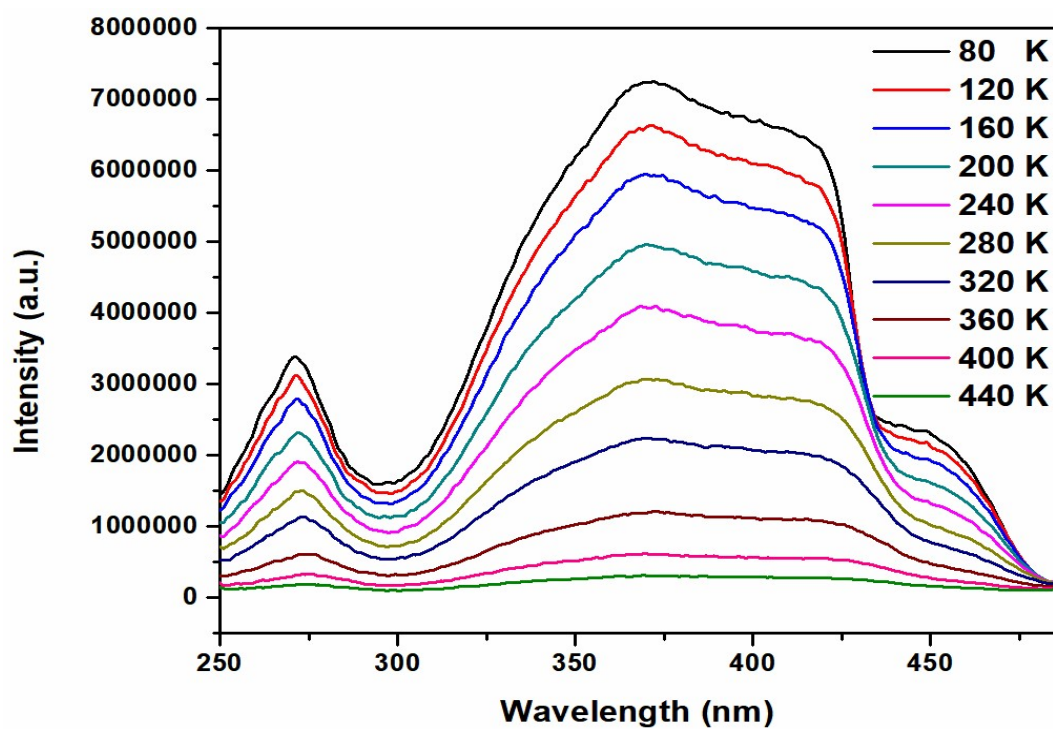

**Fig. S10.** Temperature dependent fluorescence excitation spectra of MIL-53-Al.

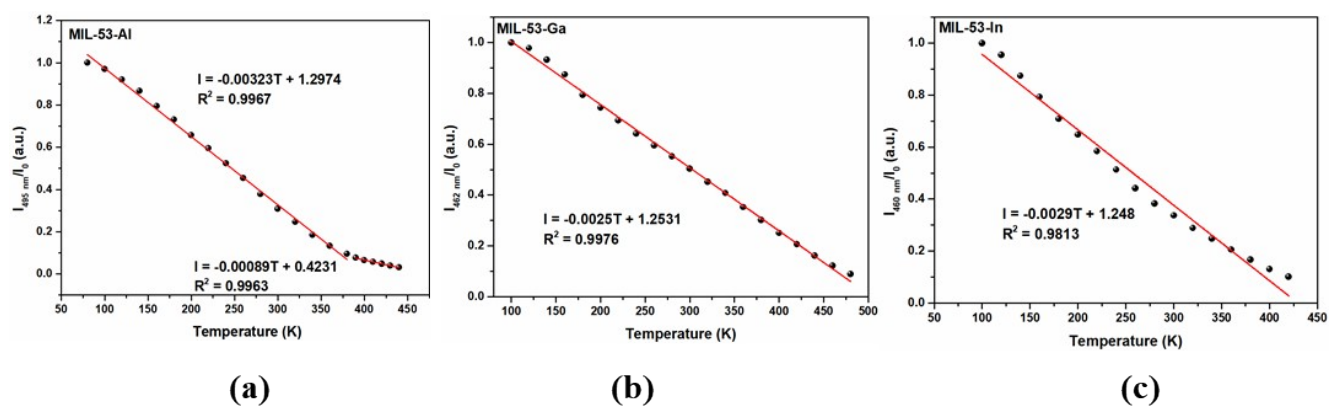

**Fig. S11.** Linear fitting diagrams of MIL-53 fluorescence intensity to temperature.

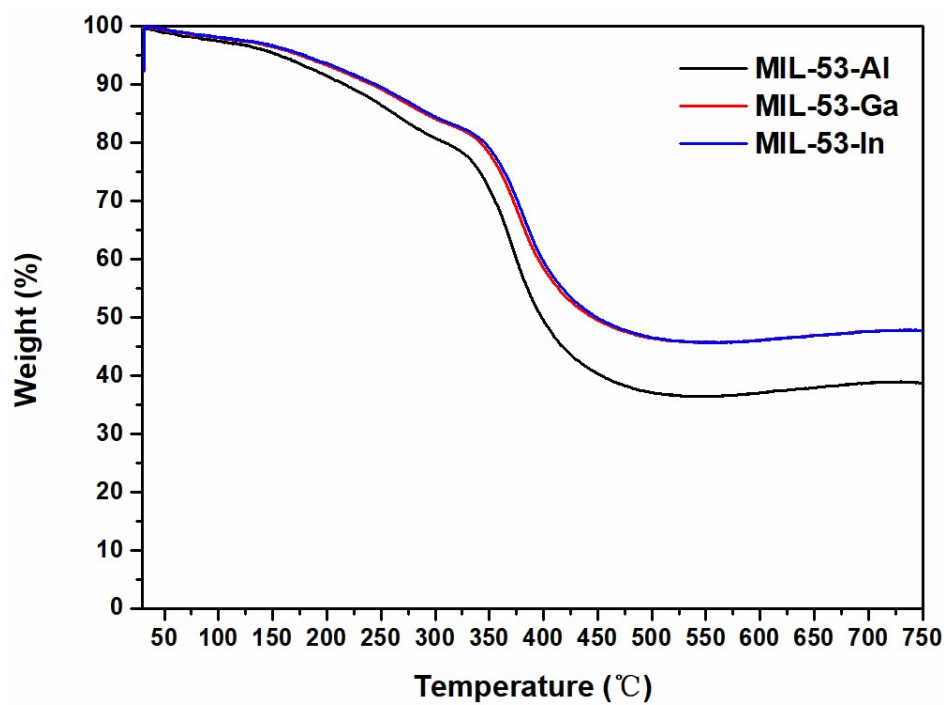

**Fig. S12.** TGA curves for MIL-5 MOFs.
